# Supplementary material
Source: MDPI journal article supplement (https://www.mdpi.com/2073-4352/2/2/393)
Supplement: s1 [file s1]

Archive with 3 entries (2 files):
- crystals-02-00393-supplementary/
- crystals-02-00393-supplementary/crystals-02-00393-Supplementary Material.pdf
- crystals-02-00393-supplementary/shirahata_rev.cif
