# Supplementary material
Source: MDPI journal article supplement (https://www.mdpi.com/2073-4352/2/2/393)
Supplement: s1 [file s1 › crystals-02-00393-supplementary/crystals-02-00393-Supplementary Material.pdf]

# Supplementary Information

## 1. Theoretical Calculation of MeDTET

Density functional theory (DFT) calculations of MeDTET were carried out using a hybrid method of Hartree-Fock and B3LYP method [S1–S3]. They are performed with the Gaussian 09 program package [S4] using the 6-31G(d) basis set [S5].

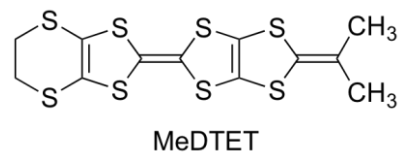

**Figure S1.** (a) Top view and side view of optimized structure for MeDTET are represented by ball and stick model (left) and space-filling model (right). (b) HOMO of MeDTET. The energy level is  $-4.74$  eV.

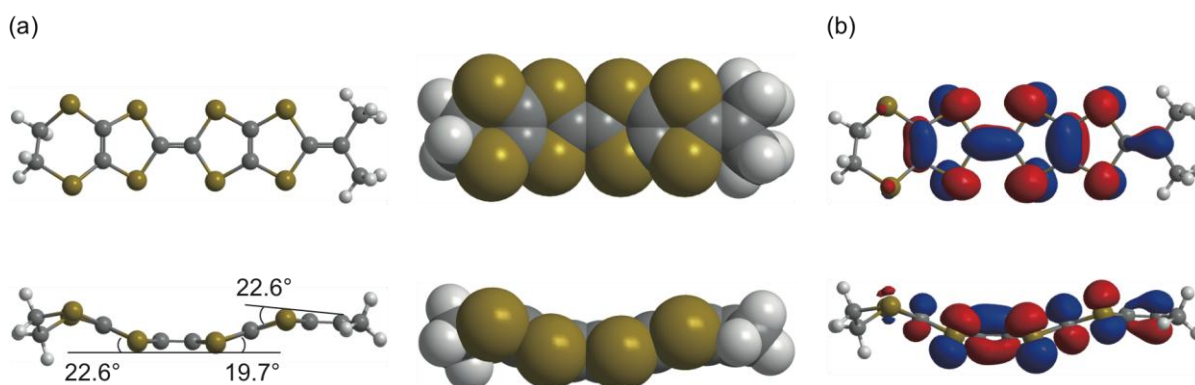

## 2. Definition of Geometrical Parameters

**Figure S2.** Definition of geometrical parameters:  $x$  and  $y$  are the slip distance along the molecular long and short axes, respectively;  $z$  is the interplanar distance between the molecular plane. The intermolecular vector is calculated based on the center of gravity of the TTF core of the unsymmetrical donor molecule.

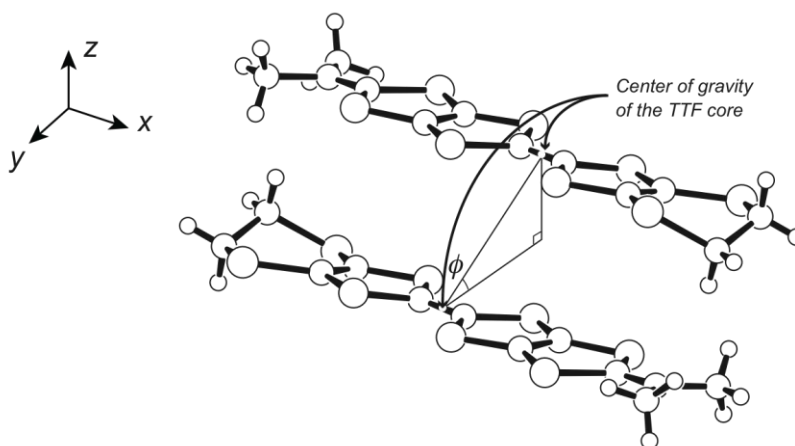

### 3. Temperature Dependence of the Resistivity

**Figure S3.** Temperature dependence of the resistivity ( $\rho$ ) of **4** (blue line), **5** (pink line), **6** (orange line), and **7** (green line).

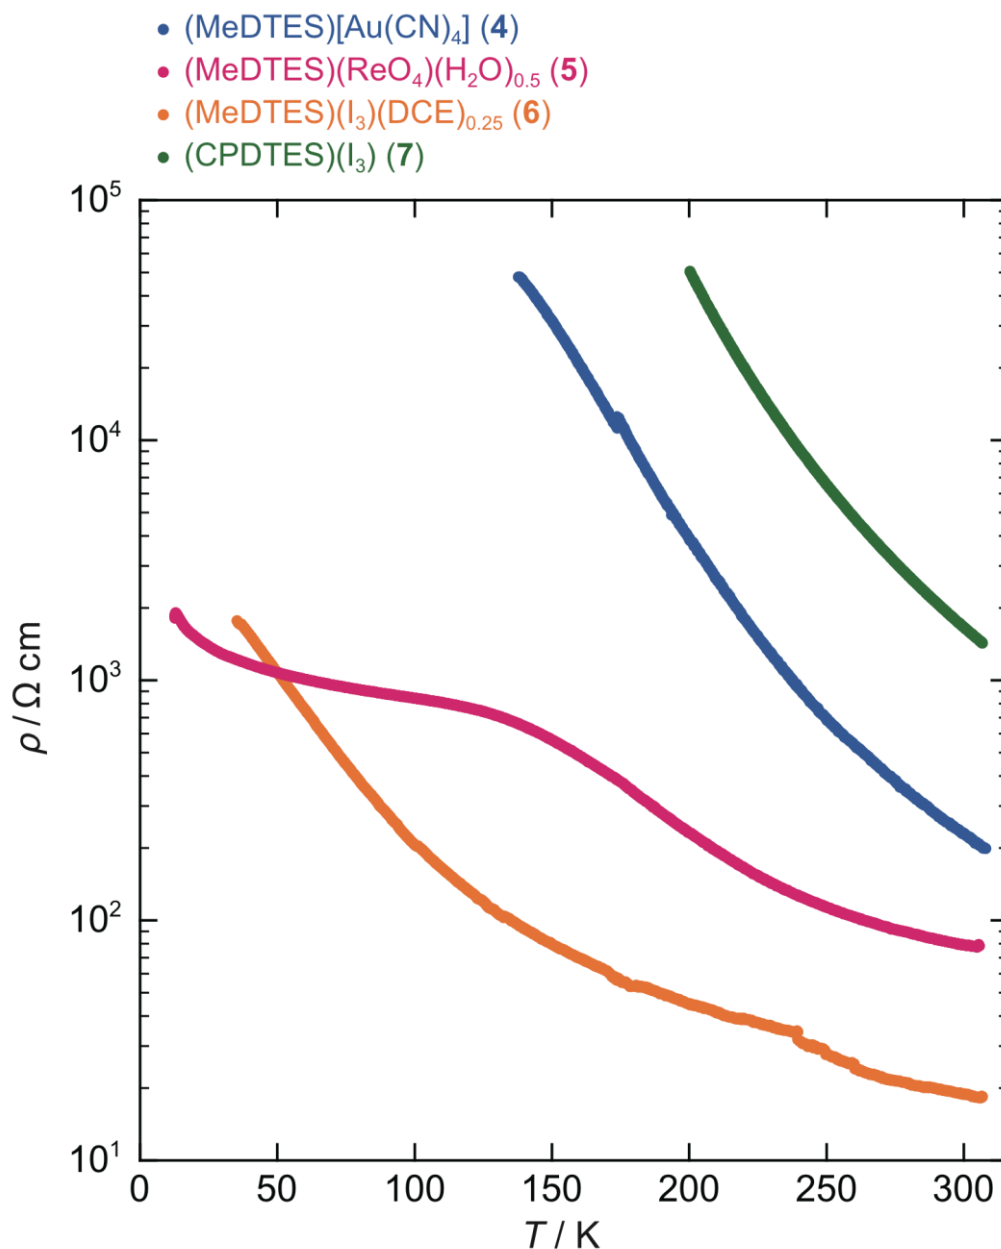

### References

- S1. Becke, A.D. Density-functional exchange-energy approximation with correct asymptotic behavior. *Phys. Rev. A* **1988**, 38, 3098–3100.
- S2. Becke, A.D. Density-functional thermochemistry. III. The role of exact exchange. *J. Chem. Phys.* **1993**, 98, 5648–5652.
- S3. Lee, C.; Yang, W.; Parr, R.G. Development of the Colle-Salvetti correlation-energy formula into a functional of the electron density. *Phys. Rev. B* **1998**, 37, 785–789.

- S4. Frisch, M.J.; Trucks, G.W.; Schlegel, H.B.; Scuseria, G.E.; Robb, M.A.; Cheeseman, J.R.; Scalmani, G.; Barone, V.; Mennucci, B.; Petersson, G.A.; *et al.* *Gaussian 09*, Revision C.01; Gaussian, Inc.: Wallingford, CT, USA, 2010.
- S5. Hehre, W.J.; Ditchfield, R.; Pople, J.A. Self-consistent molecular orbital methods. XII. Further extensions of Gaussian-type basis sets for use in molecular orbital studies of organic molecules. *J. Chem. Phys.* **1972**, *56*, 2257–2261.
- S6. Mori, T. Structural genealogy of BEDT-TTF-based organic conductors I. Parallel Molecules:  $\beta$  and  $\beta''$  Phases. *Bull. Chem. Soc. Jpn.* **1998**, *71*, 2509–2526.

© 2012 by the authors; licensee MDPI, Basel, Switzerland. This article is an open access article distributed under the terms and conditions of the Creative Commons Attribution license (<http://creativecommons.org/licenses/by/3.0/>).
