# Supplementary material
Source: MDPI journal article supplement (https://www.mdpi.com/2073-4352/2/2/393)
Supplement: s1 [file s1 › crystals-02-00393-supplementary/shirahata_rev.cif]

data_publication_text
_publ_requested_journal          'Crystals'
_publ_contact_author_name        'Dr Takashi Shirahata'
_publ_contact_author_address     
;Department of Applied Chemistry, 
Graduate School of Science and Engineering, 
Ehime University, 
3 Bunkyo-cho, Matsuyama 790-8577, Japan
;
_publ_contact_author_email       shirahata.takashi.mj@ehime-u.ac.jp
_publ_contact_author_phone       +81-89-927-8537
_publ_contact_author_fax         +81-89-927-9922
loop_
_publ_author_name
_publ_author_address
'Furuta, Keisuke'
;Ehime University
;
'Kohno, Shuhei'
;Ehime University
;
'Shirahata, Takashi'
;Ehime University
;
'Yamasaki, Koya'
;Ehime University
;
'Hino, Shojun'
;Ehime University
;
'Misaki, Yohji'
;Ehime University
;
 
data_4_MeDTES-AuCN4 
 
_audit_creation_method            SHELXL-97 
_chemical_name_systematic 
; 
 ? 
; 
_chemical_name_common             ? 
_chemical_melting_point           ? 
_chemical_formula_moiety          ? 
_chemical_formula_sum 
 'C16 H10 Au N4 S6 Se2' 
_chemical_formula_weight          805.53 
 
loop_ 
 _atom_type_symbol 
 _atom_type_description 
 _atom_type_scat_dispersion_real 
 _atom_type_scat_dispersion_imag 
 _atom_type_scat_source 
 'C'  'C'   0.0033   0.0016 
 'International Tables Vol C Tables 4.2.6.8 and 6.1.1.4' 
 'H'  'H'   0.0000   0.0000 
 'International Tables Vol C Tables 4.2.6.8 and 6.1.1.4' 
 'Au'  'Au'  -2.0133   8.8022 
 'International Tables Vol C Tables 4.2.6.8 and 6.1.1.4' 
 'N'  'N'   0.0061   0.0033 
 'International Tables Vol C Tables 4.2.6.8 and 6.1.1.4' 
 'S'  'S'   0.1246   0.1234 
 'International Tables Vol C Tables 4.2.6.8 and 6.1.1.4' 
 'Se'  'Se'  -0.0929   2.2259 
 'International Tables Vol C Tables 4.2.6.8 and 6.1.1.4' 
 
_symmetry_cell_setting            orthorhombic 
_symmetry_space_group_name_H-M    'P n m a'
_symmetry_space_group_name_Hall   '-P 2ac 2n'
_symmetry_Int_Tables_number       62 
 
loop_ 
 _symmetry_equiv_pos_as_xyz 
 'x, y, z' 
 '-x+1/2, y+1/2, z+1/2' 
 'x, -y+1/2, z' 
 '-x+1/2, -y, z+1/2' 
 '-x, -y, -z' 
 'x-1/2, -y-1/2, -z-1/2' 
 '-x, y-1/2, -z' 
 'x-1/2, y, -z-1/2' 
 
_cell_length_a                    42.054(4) 
_cell_length_b                    12.3735(9) 
_cell_length_c                    4.2760(3) 
_cell_angle_alpha                 90.00 
_cell_angle_beta                  90.00 
_cell_angle_gamma                 90.00 
_cell_volume                      2225.0(3) 
_cell_formula_units_Z             4 
_cell_measurement_temperature     273 
_cell_measurement_reflns_used     3327 
_cell_measurement_theta_min       3.29 
_cell_measurement_theta_max       27.48 
 
_exptl_crystal_description        platelet 
_exptl_crystal_colour             black 
_exptl_crystal_size_max           0.050 
_exptl_crystal_size_mid           0.040 
_exptl_crystal_size_min           0.010 
_exptl_crystal_density_meas       ? 
_exptl_crystal_density_diffrn     2.405 
_exptl_crystal_density_method     'not measured' 
_exptl_crystal_F_000              1508 
_exptl_absorpt_coefficient_mu     10.459 
_exptl_absorpt_correction_type    empirical 
_exptl_absorpt_correction_T_min   0.6229 
_exptl_absorpt_correction_T_max   0.9026 
_exptl_absorpt_process_details    
;
?
; 
 
_exptl_special_details 
; 
 ? 
; 
 
_diffrn_ambient_temperature       273 
_diffrn_radiation_wavelength      0.71075 
_diffrn_radiation_type            MoK\a 
_diffrn_radiation_source          'fine-focus sealed tube' 
_diffrn_radiation_monochromator   graphite 
_diffrn_measurement_device_type   'Rigaku Saturn724' 
_diffrn_measurement_method        \w 
_diffrn_detector_area_resol_mean  7.111 
_diffrn_standards_number          ? 
_diffrn_standards_interval_count  ? 
_diffrn_standards_interval_time   ? 
_diffrn_standards_decay_%         ? 
_diffrn_reflns_number             19893 
_diffrn_reflns_av_R_equivalents   0.0660 
_diffrn_reflns_av_sigmaI/netI     0.0351 
_diffrn_reflns_limit_h_min        -54 
_diffrn_reflns_limit_h_max        54 
_diffrn_reflns_limit_k_min        -15 
_diffrn_reflns_limit_k_max        16 
_diffrn_reflns_limit_l_min        -5 
_diffrn_reflns_limit_l_max        5 
_diffrn_reflns_theta_min          3.29 
_diffrn_reflns_theta_max          27.45 
_reflns_number_total              2660 
_reflns_number_gt                 2464 
_reflns_threshold_expression      >2sigma(I) 
 
_computing_data_collection        'CrystalClear (Rigaku Inc., 2008)' 
_computing_cell_refinement        CrystalClear 
_computing_data_reduction         CrystalClear 
_computing_structure_solution     'SIR2004 (Burla, et al., 2005)' 
_computing_structure_refinement   'SHELXL97 (Sheldrick, 2008)' 
_computing_molecular_graphics     'CrystalStructure 4.0' 
_computing_publication_material   'CrystalStructure 4.0 (Rigaku, 2010)' 
 
_refine_special_details 
; 
 Refinement of F^2^ against ALL reflections.  The weighted R-factor wR and 
 goodness of fit S are based on F^2^, conventional R-factors R are based 
 on F, with F set to zero for negative F^2^. The threshold expression of 
 F^2^ > 2sigma(F^2^) is used only for calculating R-factors(gt) etc. and is 
 not relevant to the choice of reflections for refinement.  R-factors based 
 on F^2^ are statistically about twice as large as those based on F, and R- 
 factors based on ALL data will be even larger. 
; 
 
_refine_ls_structure_factor_coef  Fsqd  
_refine_ls_matrix_type            full 
_refine_ls_weighting_scheme       calc  
_refine_ls_weighting_details 
 'calc w=1/[\s^2^(Fo^2^)+(0.0387P)^2^+12.5049P] where P=(Fo^2^+2Fc^2^)/3' 
_atom_sites_solution_primary      direct 
_atom_sites_solution_secondary    difmap 
_atom_sites_solution_hydrogens    geom 
_refine_ls_hydrogen_treatment     constr 
_refine_ls_extinction_method      none 
_refine_ls_extinction_coef        ? 
_refine_ls_number_reflns          2660 
_refine_ls_number_parameters      149 
_refine_ls_number_restraints      0 
_refine_ls_R_factor_all           0.0593 
_refine_ls_R_factor_gt            0.0535 
_refine_ls_wR_factor_ref          0.1154 
_refine_ls_wR_factor_gt           0.1123 
_refine_ls_goodness_of_fit_ref    1.214 
_refine_ls_restrained_S_all       1.214 
_refine_ls_shift/su_max           0.002 
_refine_ls_shift/su_mean          0.000 
 
loop_ 
 _atom_site_label 
 _atom_site_type_symbol 
 _atom_site_fract_x 
 _atom_site_fract_y 
 _atom_site_fract_z 
 _atom_site_U_iso_or_equiv 
 _atom_site_adp_type 
 _atom_site_occupancy 
 _atom_site_symmetry_multiplicity 
 _atom_site_calc_flag 
 _atom_site_refinement_flags 
 _atom_site_disorder_assembly 
 _atom_site_disorder_group 
Se1 Se 0.72871(2) 0.40050(8) -0.6521(2) 0.0596(3) Uani 1 1 d . . . 
S1 S 0.66820(5) 0.36786(16) -0.2633(5) 0.0466(5) Uani 1 1 d . . . 
S2 S 0.60590(5) 0.36956(15) 0.1806(5) 0.0457(5) Uani 1 1 d . . . 
S3 S 0.54539(5) 0.37159(18) 0.5789(6) 0.0556(6) Uani 1 1 d . . . 
C1A C 0.7596(8) 0.310(3) -0.791(8) 0.087(10) Uani 0.50 1 d P . 1 
H1A1 H 0.7553 0.2970 -1.0106 0.104 Uiso 0.50 1 calc PR . 1 
H1A2 H 0.7794 0.3501 -0.7808 0.104 Uiso 0.50 1 calc PR . 1 
C1B C 0.7656(6) 0.300(3) -0.639(7) 0.069(8) Uani 0.50 1 d P . 2 
H1B1 H 0.7834 0.3336 -0.7434 0.083 Uiso 0.50 1 calc PR . 2 
H1B2 H 0.7715 0.2882 -0.4225 0.083 Uiso 0.50 1 calc PR . 2 
C2 C 0.69888(17) 0.3053(7) -0.4683(18) 0.0454(18) Uani 1 1 d . . . 
C3 C 0.6501(3) 0.2500 -0.134(3) 0.042(2) Uani 1 2 d S . . 
C4 C 0.6232(3) 0.2500 0.049(3) 0.042(2) Uani 1 2 d S . . 
C5 C 0.57582(16) 0.3051(7) 0.3806(19) 0.0443(18) Uani 1 1 d . . . 
C6 C 0.5247(3) 0.2500 0.676(3) 0.050(3) Uani 1 2 d S . . 
C7 C 0.4959(3) 0.2500 0.812(4) 0.059(3) Uani 1 2 d S . . 
C8 C 0.4805(3) 0.3581(9) 0.895(3) 0.082(3) Uani 1 1 d . . . 
H8A H 0.4940 0.4161 0.8280 0.122 Uiso 1 1 calc R . . 
H8B H 0.4774 0.3623 1.1173 0.122 Uiso 1 1 calc R . . 
H8C H 0.4603 0.3637 0.7919 0.122 Uiso 1 1 calc R . . 
Au1 Au 0.630453(10) 0.7500 -0.06613(11) 0.04266(16) Uani 1 2 d S . . 
N1 N 0.6728(2) 0.5807(8) 0.290(3) 0.081(3) Uani 1 1 d . . . 
N2 N 0.58979(19) 0.9248(7) -0.412(2) 0.069(2) Uani 1 1 d . . . 
C9 C 0.6573(2) 0.6390(7) 0.154(2) 0.054(2) Uani 1 1 d . . . 
C10 C 0.6040(2) 0.8639(7) -0.283(2) 0.053(2) Uani 1 1 d . . . 
 
loop_ 
 _atom_site_aniso_label 
 _atom_site_aniso_U_11 
 _atom_site_aniso_U_22 
 _atom_site_aniso_U_33 
 _atom_site_aniso_U_23 
 _atom_site_aniso_U_13 
 _atom_site_aniso_U_12 
Se1 0.0497(5) 0.0642(6) 0.0650(6) 0.0083(5) 0.0015(4) -0.0132(4) 
S1 0.0507(11) 0.0331(10) 0.0560(12) -0.0020(9) 0.0006(9) -0.0026(8) 
S2 0.0468(10) 0.0288(9) 0.0614(13) 0.0015(9) 0.0019(9) 0.0013(8) 
S3 0.0444(10) 0.0386(11) 0.0839(16) -0.0027(11) 0.0040(11) 0.0034(9) 
C1A 0.09(2) 0.074(17) 0.10(2) 0.01(2) 0.025(19) 0.025(16) 
C1B 0.032(9) 0.081(17) 0.09(2) 0.020(16) -0.006(12) 0.002(9) 
C2 0.042(4) 0.058(5) 0.037(4) 0.003(4) -0.008(3) -0.003(3) 
C3 0.043(6) 0.037(6) 0.045(6) 0.000 -0.005(5) 0.000 
C4 0.048(6) 0.031(5) 0.046(6) 0.000 -0.012(5) 0.000 
C5 0.032(3) 0.047(4) 0.053(5) -0.005(4) -0.004(3) -0.001(3) 
C6 0.038(6) 0.054(7) 0.059(7) 0.000 -0.002(5) 0.000 
C7 0.047(7) 0.060(8) 0.069(9) 0.000 0.005(6) 0.000 
C8 0.070(6) 0.087(8) 0.089(8) -0.012(7) -0.004(6) 0.035(6) 
Au1 0.0420(2) 0.0353(2) 0.0507(3) 0.000 0.00568(19) 0.000 
N1 0.071(5) 0.064(6) 0.110(8) 0.017(6) -0.005(5) 0.006(5) 
N2 0.058(5) 0.057(5) 0.091(6) 0.010(5) 0.000(4) 0.006(4) 
C9 0.053(5) 0.046(5) 0.064(6) 0.002(4) 0.004(4) -0.005(4) 
C10 0.058(5) 0.040(5) 0.062(6) -0.002(4) 0.005(4) -0.003(4) 
 
_geom_special_details 
; 
 All esds (except the esd in the dihedral angle between two l.s. planes) 
 are estimated using the full covariance matrix.  The cell esds are taken 
 into account individually in the estimation of esds in distances, angles 
 and torsion angles; correlations between esds in cell parameters are only 
 used when they are defined by crystal symmetry.  An approximate (isotropic) 
 treatment of cell esds is used for estimating esds involving l.s. planes. 
; 
 
loop_ 
 _geom_bond_atom_site_label_1 
 _geom_bond_atom_site_label_2 
 _geom_bond_distance 
 _geom_bond_site_symmetry_2 
 _geom_bond_publ_flag 
Se1 C1A 1.81(3) . ? 
Se1 C2 1.892(8) . ? 
Se1 C1B 1.99(3) . ? 
S1 C3 1.736(6) . ? 
S1 C2 1.741(8) . ? 
S2 C5 1.723(8) . ? 
S2 C4 1.741(7) . ? 
S3 C5 1.742(8) . ? 
S3 C6 1.787(7) . ? 
C1A C1B 1.53(3) 3 ? 
C1A H1A1 0.9700 . ? 
C1A H1A2 0.9700 . ? 
C1B C1A 1.53(3) 3 ? 
C1B H1B1 0.9700 . ? 
C1B H1B2 0.9700 . ? 
C2 C2 1.369(17) 3 ? 
C3 C4 1.377(16) . ? 
C3 S1 1.736(6) 3 ? 
C4 S2 1.741(7) 3 ? 
C5 C5 1.363(16) 3 ? 
C6 C7 1.343(16) . ? 
C6 S3 1.787(7) 3 ? 
C7 C8 1.528(11) 3 ? 
C7 C8 1.528(11) . ? 
C8 H8A 0.9600 . ? 
C8 H8B 0.9600 . ? 
C8 H8C 0.9600 . ? 
Au1 C9 2.010(10) 3_565 ? 
Au1 C9 2.010(10) . ? 
Au1 C10 2.020(10) 3_565 ? 
Au1 C10 2.020(10) . ? 
N1 C9 1.135(12) . ? 
N2 C10 1.109(11) . ? 
 
loop_ 
 _geom_angle_atom_site_label_1 
 _geom_angle_atom_site_label_2 
 _geom_angle_atom_site_label_3 
 _geom_angle 
 _geom_angle_site_symmetry_1 
 _geom_angle_site_symmetry_3 
 _geom_angle_publ_flag 
C1A Se1 C2 103.2(12) . . ? 
C1A Se1 C1B 20.8(12) . . ? 
C2 Se1 C1B 96.6(9) . . ? 
C3 S1 C2 96.4(4) . . ? 
C5 S2 C4 94.2(4) . . ? 
C5 S3 C6 94.2(4) . . ? 
C1B C1A Se1 122(3) 3 . ? 
C1B C1A H1A1 106.9 3 . ? 
Se1 C1A H1A1 106.9 . . ? 
C1B C1A H1A2 106.9 3 . ? 
Se1 C1A H1A2 106.9 . . ? 
H1A1 C1A H1A2 106.7 . . ? 
C1A C1B Se1 115(2) 3 . ? 
C2 C2 S1 116.4(3) 3 . ? 
C1A C1B H1B1 108.6 3 . ? 
Se1 C1B H1B1 108.6 . . ? 
C1A C1B H1B2 108.6 3 . ? 
Se1 C1B H1B2 108.6 . . ? 
H1B1 C1B H1B2 107.6 . . ? 
C2 C2 Se1 128.5(3) 3 . ? 
S1 C2 Se1 115.1(5) . . ? 
C4 C3 S1 122.8(3) . . ? 
C4 C3 S1 122.8(3) . 3 ? 
S1 C3 S1 114.3(6) . 3 ? 
C3 C4 S2 121.8(3) . 3 ? 
C3 C4 S2 121.8(3) . . ? 
S2 C4 S2 116.4(7) 3 . ? 
C5 C5 S2 117.6(3) 3 . ? 
C5 C5 S3 118.2(3) 3 . ? 
S2 C5 S3 124.2(5) . . ? 
C7 C6 S3 122.7(3) . . ? 
C7 C6 S3 122.7(3) . 3 ? 
S3 C6 S3 114.7(6) . 3 ? 
C6 C7 C8 118.9(6) . 3 ? 
C6 C7 C8 118.9(6) . . ? 
C8 C7 C8 122.1(13) 3 . ? 
C7 C8 H8A 109.5 . . ? 
C7 C8 H8B 109.5 . . ? 
H8A C8 H8B 109.5 . . ? 
C7 C8 H8C 109.5 . . ? 
H8A C8 H8C 109.5 . . ? 
H8B C8 H8C 109.5 . . ? 
C9 Au1 C9 86.2(5) 3_565 . ? 
C9 Au1 C10 178.9(4) 3_565 3_565 ? 
C9 Au1 C10 92.7(4) . 3_565 ? 
C9 Au1 C10 92.7(4) 3_565 . ? 
C9 Au1 C10 178.9(4) . . ? 
C10 Au1 C10 88.4(5) 3_565 . ? 
N1 C9 Au1 176.0(10) . . ? 
N2 C10 Au1 177.6(10) . . ? 
 
_diffrn_measured_fraction_theta_max    0.998 
_diffrn_reflns_theta_full              27.45 
_diffrn_measured_fraction_theta_full   0.998 
_refine_diff_density_max    1.580 
_refine_diff_density_min   -0.923 
_refine_diff_density_rms    0.154 
 
data_5_MeDTES-ReO4 
 
_audit_creation_method            SHELXL-97 
_chemical_name_systematic 
; 
 ? 
; 
_chemical_name_common             ? 
_chemical_melting_point           ? 
_chemical_formula_moiety          ? 
_chemical_formula_sum 
 'C12 H11 O4.50 Re S6 Se2' 
_chemical_formula_weight          763.69 
 
loop_ 
 _atom_type_symbol 
 _atom_type_description 
 _atom_type_scat_dispersion_real 
 _atom_type_scat_dispersion_imag 
 _atom_type_scat_source 
 'C'  'C'   0.0033   0.0016 
 'International Tables Vol C Tables 4.2.6.8 and 6.1.1.4' 
 'H'  'H'   0.0000   0.0000 
 'International Tables Vol C Tables 4.2.6.8 and 6.1.1.4' 
 'O'  'O'   0.0106   0.0060 
 'International Tables Vol C Tables 4.2.6.8 and 6.1.1.4' 
 'Re'  'Re'  -1.0185   7.2310 
 'International Tables Vol C Tables 4.2.6.8 and 6.1.1.4' 
 'S'  'S'   0.1246   0.1234 
 'International Tables Vol C Tables 4.2.6.8 and 6.1.1.4' 
 'Se'  'Se'  -0.0929   2.2259 
 'International Tables Vol C Tables 4.2.6.8 and 6.1.1.4' 
 
_symmetry_cell_setting            triclinic 
_symmetry_space_group_name_H-M    'P -1'
_symmetry_space_group_name_Hall   '-P 1'
_symmetry_Int_Tables_number       2 
 
loop_ 
 _symmetry_equiv_pos_as_xyz 
 'x, y, z' 
 '-x, -y, -z' 
 
_cell_length_a                    8.532(6) 
_cell_length_b                    9.750(7) 
_cell_length_c                    13.597(10) 
_cell_angle_alpha                 94.949(17) 
_cell_angle_beta                  94.723(14) 
_cell_angle_gamma                 93.783(13) 
_cell_volume                      1120.0(14) 
_cell_formula_units_Z             2 
_cell_measurement_temperature     120 
_cell_measurement_reflns_used     3435 
_cell_measurement_theta_min       3.02 
_cell_measurement_theta_max       27.42 
 
_exptl_crystal_description        platelet 
_exptl_crystal_colour             black 
_exptl_crystal_size_max           0.040 
_exptl_crystal_size_mid           0.020 
_exptl_crystal_size_min           0.010 
_exptl_crystal_density_meas       ? 
_exptl_crystal_density_diffrn     2.264 
_exptl_crystal_density_method     'not measured' 
_exptl_crystal_F_000              716 
_exptl_absorpt_coefficient_mu     9.250 
_exptl_absorpt_correction_type    none 
_exptl_absorpt_process_details    ? 
 
_exptl_special_details 
; 
 ? 
; 
 
_diffrn_ambient_temperature       120 
_diffrn_radiation_wavelength      0.71075 
_diffrn_radiation_type            MoK\a 
_diffrn_radiation_source          'fine-focus sealed tube' 
_diffrn_radiation_monochromator   graphite 
_diffrn_measurement_device_type   'Rigaku Saturn724' 
_diffrn_measurement_method        \w 
_diffrn_detector_area_resol_mean  7.111 
_diffrn_standards_number          ? 
_diffrn_standards_interval_count  ? 
_diffrn_standards_interval_time   ? 
_diffrn_standards_decay_%         ? 
_diffrn_reflns_number             13612 
_diffrn_reflns_av_R_equivalents   0.0800 
_diffrn_reflns_av_sigmaI/netI     0.0950 
_diffrn_reflns_limit_h_min        -11 
_diffrn_reflns_limit_h_max        11 
_diffrn_reflns_limit_k_min        -12 
_diffrn_reflns_limit_k_max        12 
_diffrn_reflns_limit_l_min        -17 
_diffrn_reflns_limit_l_max        17 
_diffrn_reflns_theta_min          3.02 
_diffrn_reflns_theta_max          27.42 
_reflns_number_total              5066 
_reflns_number_gt                 3763 
_reflns_threshold_expression      >2sigma(I) 
 
_computing_data_collection        'CrystalClear (Rigaku Inc., 2008)' 
_computing_cell_refinement        CrystalClear 
_computing_data_reduction         CrystalClear 
_computing_structure_solution     'SHELXS97 (Sheldrick, 2008)' 
_computing_structure_refinement   'SHELXL97 (Sheldrick, 2008)' 
_computing_molecular_graphics     'CrystalStructure 4.0' 
_computing_publication_material   'CrystalStructure 4.0 (Rigaku, 2010)' 
 
_refine_special_details 
; 
 Refinement of F^2^ against ALL reflections.  The weighted R-factor wR and 
 goodness of fit S are based on F^2^, conventional R-factors R are based 
 on F, with F set to zero for negative F^2^. The threshold expression of 
 F^2^ > 2sigma(F^2^) is used only for calculating R-factors(gt) etc. and is 
 not relevant to the choice of reflections for refinement.  R-factors based 
 on F^2^ are statistically about twice as large as those based on F, and R- 
 factors based on ALL data will be even larger. 
; 
 
_refine_ls_structure_factor_coef  Fsqd  
_refine_ls_matrix_type            full 
_refine_ls_weighting_scheme       calc  
_refine_ls_weighting_details 
 'calc w=1/[\s^2^(Fo^2^)+(0.1125P)^2^+19.7991P] where P=(Fo^2^+2Fc^2^)/3' 
_atom_sites_solution_primary      direct 
_atom_sites_solution_secondary    difmap 
_atom_sites_solution_hydrogens    geom 
_refine_ls_hydrogen_treatment     constr 
_refine_ls_extinction_method      none 
_refine_ls_extinction_coef        ? 
_refine_ls_number_reflns          5066 
_refine_ls_number_parameters      206 
_refine_ls_number_restraints      0 
_refine_ls_R_factor_all           0.1084 
_refine_ls_R_factor_gt            0.0835 
_refine_ls_wR_factor_ref          0.2303 
_refine_ls_wR_factor_gt           0.2044 
_refine_ls_goodness_of_fit_ref    1.070 
_refine_ls_restrained_S_all       1.070 
_refine_ls_shift/su_max           0.000 
_refine_ls_shift/su_mean          0.000 
 
loop_ 
 _atom_site_label 
 _atom_site_type_symbol 
 _atom_site_fract_x 
 _atom_site_fract_y 
 _atom_site_fract_z 
 _atom_site_U_iso_or_equiv 
 _atom_site_adp_type 
 _atom_site_occupancy 
 _atom_site_symmetry_multiplicity 
 _atom_site_calc_flag 
 _atom_site_refinement_flags 
 _atom_site_disorder_assembly 
 _atom_site_disorder_group 
Se1 Se 1.1722(2) 0.39868(18) 0.07978(12) 0.0371(4) Uani 1 1 d . . . 
Se2 Se 1.36118(17) 0.61318(15) 0.30432(11) 0.0261(3) Uani 1 1 d . . . 
S1 S 1.0066(5) 0.2488(4) 0.2364(3) 0.0276(8) Uani 1 1 d . . . 
S2 S 1.1441(4) 0.4211(3) 0.4123(3) 0.0208(7) Uani 1 1 d . . . 
S3 S 0.8304(4) 0.0444(3) 0.3641(2) 0.0215(7) Uani 1 1 d . . . 
S4 S 0.9394(4) 0.2201(3) 0.5482(3) 0.0213(7) Uani 1 1 d . . . 
S5 S 0.6349(4) -0.1491(3) 0.4806(3) 0.0237(7) Uani 1 1 d . . . 
S6 S 0.7495(4) 0.0277(4) 0.6692(3) 0.0237(7) Uani 1 1 d . . . 
C1 C 1.334(2) 0.550(2) 0.0899(16) 0.053(5) Uani 1 1 d . . . 
H1A H 1.4383 0.5117 0.1011 0.063 Uiso 1 1 calc R . . 
H1B H 1.3316 0.5906 0.0256 0.063 Uiso 1 1 calc R . . 
C2 C 1.321(2) 0.6644(18) 0.1712(12) 0.040(4) Uani 1 1 d . . . 
H2A H 1.2132 0.6967 0.1638 0.048 Uiso 1 1 calc R . . 
H2B H 1.3959 0.7430 0.1618 0.048 Uiso 1 1 calc R . . 
C3 C 1.1409(19) 0.3871(15) 0.2156(13) 0.033(4) Uani 1 1 d . . . 
C4 C 1.2060(16) 0.4640(15) 0.2969(13) 0.031(3) Uani 1 1 d . . . 
C5 C 1.0224(15) 0.2753(14) 0.3632(11) 0.023(3) Uani 1 1 d . . . 
C6 C 0.9427(17) 0.1912(17) 0.4199(13) 0.033(3) Uani 1 1 d . . . 
C7 C 0.7593(17) -0.0033(16) 0.4714(11) 0.027(3) Uani 1 1 d . . . 
C8 C 0.8057(15) 0.0747(16) 0.5572(11) 0.027(3) Uani 1 1 d . . . 
C9 C 0.6272(16) -0.1180(15) 0.6121(12) 0.028(3) Uani 1 1 d . . . 
C10 C 0.5362(15) -0.1997(15) 0.6580(11) 0.026(3) Uani 1 1 d . . . 
C11 C 0.4316(16) -0.3204(13) 0.6110(11) 0.025(2) Uani 1 1 d . . . 
H11A H 0.3294 -0.3205 0.6391 0.029 Uiso 1 1 calc R . . 
H11B H 0.4807 -0.4060 0.6237 0.029 Uiso 1 1 calc R . . 
H11C H 0.4159 -0.3140 0.5394 0.029 Uiso 1 1 calc R . . 
C12 C 0.52792(7) -0.17524(6) 0.77021(4) 0.025(2) Uani 1 1 d . . . 
H12A H 0.4915 -0.0835 0.7865 0.029 Uiso 1 1 calc R . . 
H12B H 0.6329 -0.1811 0.8041 0.029 Uiso 1 1 calc R . . 
H12C H 0.4542 -0.2455 0.7918 0.029 Uiso 1 1 calc R . . 
Re1 Re 0.79829(7) 0.66905(6) 0.23955(4) 0.0268(2) Uani 1 1 d R . . 
O1 O 0.66468(7) 0.79051(6) 0.26997(4) 0.032(2) Uani 1 1 d R . . 
O2 O 0.73492(7) 0.57890(6) 0.12647(4) 0.048(3) Uani 1 1 d R . . 
O3 O 0.98122(7) 0.75336(6) 0.23593(4) 0.032(2) Uani 1 1 d R . . 
O4 O 0.81118(7) 0.55842(6) 0.33205(4) 0.035(3) Uani 1 1 d R . . 
O5 O 0.82073(7) -0.00843(6) 0.05916(4) 0.071(9) Uiso 0.50 1 d PR . . 
 
loop_ 
 _atom_site_aniso_label 
 _atom_site_aniso_U_11 
 _atom_site_aniso_U_22 
 _atom_site_aniso_U_33 
 _atom_site_aniso_U_23 
 _atom_site_aniso_U_13 
 _atom_site_aniso_U_12 
Se1 0.0469(10) 0.0362(9) 0.0256(8) -0.0018(7) 0.0031(7) -0.0112(8) 
Se2 0.0234(7) 0.0227(7) 0.0314(8) 0.0016(6) 0.0035(6) -0.0048(6) 
S1 0.0318(19) 0.0228(18) 0.0259(17) -0.0030(14) 0.0031(15) -0.0097(15) 
S2 0.0211(16) 0.0144(15) 0.0269(17) -0.0008(13) 0.0051(13) 0.0001(13) 
S3 0.0215(16) 0.0198(16) 0.0224(16) -0.0023(13) 0.0037(13) -0.0007(13) 
S4 0.0190(15) 0.0172(16) 0.0271(17) -0.0001(13) 0.0028(13) -0.0006(12) 
S5 0.0152(15) 0.0173(16) 0.0380(19) 0.0025(14) 0.0033(14) -0.0042(13) 
S6 0.0245(17) 0.0188(16) 0.0282(17) 0.0025(14) 0.0059(14) 0.0003(13) 
C1 0.044(11) 0.053(12) 0.060(13) -0.002(10) 0.004(9) 0.004(9) 
C2 0.035(9) 0.043(10) 0.037(9) 0.002(8) 0.004(7) -0.021(8) 
C3 0.033(8) 0.017(7) 0.049(10) 0.003(7) -0.001(7) -0.005(6) 
C4 0.014(6) 0.027(8) 0.051(10) 0.005(7) -0.003(6) 0.007(6) 
C5 0.010(6) 0.020(7) 0.039(8) 0.005(6) -0.004(5) -0.004(5) 
C6 0.020(7) 0.035(9) 0.045(9) 0.003(7) 0.016(7) 0.003(6) 
C7 0.022(7) 0.032(8) 0.029(7) 0.011(6) -0.004(6) 0.011(6) 
C8 0.007(6) 0.032(8) 0.039(8) -0.008(7) -0.002(5) 0.001(5) 
C9 0.020(7) 0.023(7) 0.043(9) 0.011(6) 0.005(6) 0.008(6) 
C10 0.015(6) 0.026(7) 0.038(8) 0.003(6) 0.003(6) 0.009(6) 
C11 0.023(5) 0.013(4) 0.036(5) 0.007(4) -0.004(4) -0.009(4) 
C12 0.023(5) 0.013(4) 0.036(5) 0.007(4) -0.004(4) -0.009(4) 
Re1 0.0203(3) 0.0292(4) 0.0296(3) -0.0029(2) 0.0030(2) -0.0017(2) 
O1 0.020(5) 0.037(6) 0.041(6) 0.006(5) 0.004(4) 0.004(4) 
O2 0.034(6) 0.064(9) 0.043(7) -0.016(6) -0.001(5) 0.004(6) 
O3 0.033(6) 0.036(6) 0.029(5) 0.003(5) 0.014(5) 0.001(5) 
O4 0.036(6) 0.033(6) 0.036(6) 0.006(5) 0.004(5) 0.000(5) 
 
_geom_special_details 
; 
 All esds (except the esd in the dihedral angle between two l.s. planes) 
 are estimated using the full covariance matrix.  The cell esds are taken 
 into account individually in the estimation of esds in distances, angles 
 and torsion angles; correlations between esds in cell parameters are only 
 used when they are defined by crystal symmetry.  An approximate (isotropic) 
 treatment of cell esds is used for estimating esds involving l.s. planes. 
; 
 
loop_ 
 _geom_bond_atom_site_label_1 
 _geom_bond_atom_site_label_2 
 _geom_bond_distance 
 _geom_bond_site_symmetry_2 
 _geom_bond_publ_flag 
Se1 C3 1.899(18) . ? 
Se1 C1 1.94(2) . ? 
Se2 C4 1.891(15) . ? 
Se2 C2 1.928(17) . ? 
S1 C5 1.713(15) . ? 
S1 C3 1.768(15) . ? 
S2 C5 1.753(13) . ? 
S2 C4 1.772(17) . ? 
S3 C7 1.715(15) . ? 
S3 C6 1.748(17) . ? 
S4 C6 1.746(17) . ? 
S4 C8 1.779(15) . ? 
S5 C7 1.737(16) . ? 
S5 C9 1.795(17) . ? 
S6 C8 1.724(16) . ? 
S6 C9 1.787(16) . ? 
C1 C2 1.52(3) . ? 
C1 H1A 0.9900 . ? 
C1 H1B 0.9900 . ? 
C2 H2A 0.9900 . ? 
C2 H2B 0.9900 . ? 
C3 C4 1.34(2) . ? 
C5 C6 1.36(2) . ? 
C7 C8 1.35(2) . ? 
C9 C10 1.31(2) . ? 
C10 C11 1.492(19) . ? 
C10 C12 1.532(15) . ? 
C11 H11A 0.9800 . ? 
C11 H11B 0.9800 . ? 
C11 H11C 0.9800 . ? 
C12 H12A 0.9800 . ? 
C12 H12B 0.9800 . ? 
C12 H12C 0.9800 . ? 
Re1 O3 1.7218 . ? 
Re1 O4 1.7275 . ? 
Re1 O2 1.7309 . ? 
Re1 O1 1.7449 . ? 
 
loop_ 
 _geom_angle_atom_site_label_1 
 _geom_angle_atom_site_label_2 
 _geom_angle_atom_site_label_3 
 _geom_angle 
 _geom_angle_site_symmetry_1 
 _geom_angle_site_symmetry_3 
 _geom_angle_publ_flag 
C3 Se1 C1 100.7(8) . . ? 
C4 Se2 C2 97.9(7) . . ? 
C5 S1 C3 97.0(7) . . ? 
C5 S2 C4 95.4(7) . . ? 
C7 S3 C6 95.3(8) . . ? 
C6 S4 C8 94.4(7) . . ? 
C7 S5 C9 94.6(7) . . ? 
C8 S6 C9 92.8(7) . . ? 
C2 C1 Se1 115.5(13) . . ? 
C2 C1 H1A 108.4 . . ? 
Se1 C1 H1A 108.4 . . ? 
C2 C1 H1B 108.4 . . ? 
Se1 C1 H1B 108.4 . . ? 
H1A C1 H1B 107.5 . . ? 
C1 C2 Se2 114.9(14) . . ? 
C1 C2 H2A 108.5 . . ? 
Se2 C2 H2A 108.5 . . ? 
C1 C2 H2B 108.5 . . ? 
Se2 C2 H2B 108.5 . . ? 
H2A C2 H2B 107.5 . . ? 
C4 C3 S1 115.7(13) . . ? 
C4 C3 Se1 130.6(12) . . ? 
S1 C3 Se1 113.7(8) . . ? 
C3 C4 S2 117.2(12) . . ? 
C3 C4 Se2 127.7(13) . . ? 
S2 C4 Se2 115.1(9) . . ? 
C6 C5 S1 122.1(12) . . ? 
C6 C5 S2 123.4(13) . . ? 
S1 C5 S2 114.5(8) . . ? 
C5 C6 S4 124.6(13) . . ? 
C5 C6 S3 119.8(13) . . ? 
S4 C6 S3 115.5(9) . . ? 
C8 C7 S3 118.7(12) . . ? 
C8 C7 S5 116.1(12) . . ? 
S3 C7 S5 125.2(9) . . ? 
C7 C8 S6 121.5(12) . . ? 
C7 C8 S4 116.0(12) . . ? 
S6 C8 S4 122.3(8) . . ? 
C10 C9 S6 125.5(13) . . ? 
C10 C9 S5 119.7(12) . . ? 
S6 C9 S5 114.8(8) . . ? 
C9 C10 C11 126.1(14) . . ? 
C9 C10 C12 120.5(13) . . ? 
C11 C10 C12 113.4(11) . . ? 
C10 C11 H11A 109.5 . . ? 
C10 C11 H11B 109.5 . . ? 
H11A C11 H11B 109.5 . . ? 
C10 C11 H11C 109.5 . . ? 
H11A C11 H11C 109.5 . . ? 
H11B C11 H11C 109.5 . . ? 
C10 C12 H12A 109.5 . . ? 
C10 C12 H12B 109.5 . . ? 
H12A C12 H12B 109.5 . . ? 
C10 C12 H12C 109.5 . . ? 
H12A C12 H12C 109.5 . . ? 
H12B C12 H12C 109.5 . . ? 
O3 Re1 O4 108.2 . . ? 
O3 Re1 O2 111.0 . . ? 
O4 Re1 O2 110.7 . . ? 
O3 Re1 O1 108.8 . . ? 
O4 Re1 O1 108.3 . . ? 
O2 Re1 O1 109.8 . . ? 
 
_diffrn_measured_fraction_theta_max    0.993 
_diffrn_reflns_theta_full              27.42 
_diffrn_measured_fraction_theta_full   0.993 
_refine_diff_density_max    3.407 
_refine_diff_density_min   -2.772 
_refine_diff_density_rms    0.382 
 
data_6_MeDTES-I3
 
_audit_creation_method            SHELXL-97 
_chemical_name_systematic 
; 
 ? 
; 
_chemical_name_common             ? 
_chemical_melting_point           ? 
_chemical_formula_moiety          ? 
_chemical_formula_sum 
 'C25 H22 Cl I6 S12 Se4' 
_chemical_formula_weight          1819.84 
 
loop_ 
 _atom_type_symbol 
 _atom_type_description 
 _atom_type_scat_dispersion_real 
 _atom_type_scat_dispersion_imag 
 _atom_type_scat_source 
 'C'  'C'   0.0033   0.0016 
 'International Tables Vol C Tables 4.2.6.8 and 6.1.1.4' 
 'H'  'H'   0.0000   0.0000 
 'International Tables Vol C Tables 4.2.6.8 and 6.1.1.4' 
 'I'  'I'  -0.4742   1.8119 
 'International Tables Vol C Tables 4.2.6.8 and 6.1.1.4' 
 'S'  'S'   0.1246   0.1234 
 'International Tables Vol C Tables 4.2.6.8 and 6.1.1.4' 
 'Se'  'Se'  -0.0929   2.2259 
 'International Tables Vol C Tables 4.2.6.8 and 6.1.1.4' 
 'Cl'  'Cl'   0.1484   0.1585 
 'International Tables Vol C Tables 4.2.6.8 and 6.1.1.4' 
 
_symmetry_cell_setting            triclinic 
_symmetry_space_group_name_H-M    'P -1'
_symmetry_space_group_name_Hall   '-P 1'
_symmetry_Int_Tables_number       2 
 
loop_ 
 _symmetry_equiv_pos_as_xyz 
 'x, y, z' 
 '-x, -y, -z' 
 
_cell_length_a                    7.893(2) 
_cell_length_b                    8.594(3) 
_cell_length_c                    34.646(10) 
_cell_angle_alpha                 89.481(8) 
_cell_angle_beta                  84.178(6) 
_cell_angle_gamma                 77.788(4) 
_cell_volume                      2285.0(12) 
_cell_formula_units_Z             2 
_cell_measurement_temperature     273
_cell_measurement_reflns_used     5001 
_cell_measurement_theta_min       3.01 
_cell_measurement_theta_max       27.45 
 
_exptl_crystal_description        platelet 
_exptl_crystal_colour             brown 
_exptl_crystal_size_max           0.06 
_exptl_crystal_size_mid           0.02 
_exptl_crystal_size_min           0.01 
_exptl_crystal_density_meas       ? 
_exptl_crystal_density_diffrn     2.645 
_exptl_crystal_density_method     'not measured' 
_exptl_crystal_F_000              1670 
_exptl_absorpt_coefficient_mu     7.894 
_exptl_absorpt_correction_type    empirical 
_exptl_absorpt_correction_T_min   0.6488 
_exptl_absorpt_correction_T_max   0.9395 
_exptl_absorpt_process_details    
;
?
; 
 
_exptl_special_details 
; 
 ? 
; 
 
_diffrn_ambient_temperature       273
_diffrn_radiation_wavelength      0.71075 
_diffrn_radiation_type            MoK\a 
_diffrn_radiation_source          'fine-focus sealed tube' 
_diffrn_radiation_monochromator   graphite 
_diffrn_measurement_device_type   'Rigaku Saturn724' 
_diffrn_measurement_method        \w 
_diffrn_detector_area_resol_mean  7.111 
_diffrn_standards_number          ? 
_diffrn_standards_interval_count  ? 
_diffrn_standards_interval_time   ? 
_diffrn_standards_decay_%         ? 
_diffrn_reflns_number             23602 
_diffrn_reflns_av_R_equivalents   0.0856 
_diffrn_reflns_av_sigmaI/netI     0.0792 
_diffrn_reflns_limit_h_min        -10 
_diffrn_reflns_limit_h_max        10 
_diffrn_reflns_limit_k_min        -11 
_diffrn_reflns_limit_k_max        11 
_diffrn_reflns_limit_l_min        -44 
_diffrn_reflns_limit_l_max        44 
_diffrn_reflns_theta_min          3.01 
_diffrn_reflns_theta_max          27.43 
_reflns_number_total              10260 
_reflns_number_gt                 6592 
_reflns_threshold_expression      >2sigma(I) 
 
_computing_data_collection        'CrystalClear (Rigaku Inc., 2008)' 
_computing_cell_refinement        CrystalClear
_computing_data_reduction         CrystalClear 
_computing_structure_solution     'SIR2004 (Burla, et al., 2005)'
_computing_structure_refinement   'SHELXL97 (Sheldrick, 2008)' 
_computing_molecular_graphics     'CrystalStructure 4.0' 
_computing_publication_material   'CrystalStructure 4.0 (Rigaku, 2010)' 
 
_refine_special_details 
; 
 Refinement of F^2^ against ALL reflections.  The weighted R-factor wR and 
 goodness of fit S are based on F^2^, conventional R-factors R are based 
 on F, with F set to zero for negative F^2^. The threshold expression of 
 F^2^ > 2sigma(F^2^) is used only for calculating R-factors(gt) etc. and is 
 not relevant to the choice of reflections for refinement.  R-factors based 
 on F^2^ are statistically about twice as large as those based on F, and R- 
 factors based on ALL data will be even larger. 
; 
 
_refine_ls_structure_factor_coef  Fsqd  
_refine_ls_matrix_type            full 
_refine_ls_weighting_scheme       calc  
_refine_ls_weighting_details 
 'calc w=1/[\s^2^(Fo^2^)+(0.0535P)^2^+15.1183P] where P=(Fo^2^+2Fc^2^)/3' 
_atom_sites_solution_primary      direct 
_atom_sites_solution_secondary    difmap 
_atom_sites_solution_hydrogens    geom 
_refine_ls_hydrogen_treatment     constr 
_refine_ls_extinction_method      none 
_refine_ls_extinction_coef        ? 
_refine_ls_number_reflns          10260 
_refine_ls_number_parameters      441 
_refine_ls_number_restraints      0 
_refine_ls_R_factor_all           0.1006 
_refine_ls_R_factor_gt            0.0654 
_refine_ls_wR_factor_ref          0.1813 
_refine_ls_wR_factor_gt           0.1587 
_refine_ls_goodness_of_fit_ref    1.094 
_refine_ls_restrained_S_all       1.094 
_refine_ls_shift/su_max           0.001 
_refine_ls_shift/su_mean          0.000 
 
loop_ 
 _atom_site_label 
 _atom_site_type_symbol 
 _atom_site_fract_x 
 _atom_site_fract_y 
 _atom_site_fract_z 
 _atom_site_U_iso_or_equiv 
 _atom_site_adp_type 
 _atom_site_occupancy 
 _atom_site_symmetry_multiplicity 
 _atom_site_calc_flag 
 _atom_site_refinement_flags 
 _atom_site_disorder_assembly 
 _atom_site_disorder_group 
Se1 Se 0.21109(13) -0.46042(11) 0.66359(3) 0.0390(2) Uani 1 1 d . . . 
Se2 Se -0.20118(13) -0.19254(13) 0.64068(3) 0.0441(3) Uani 1 1 d . . . 
S1 S 0.1233(3) -0.2790(3) 0.74092(6) 0.0413(6) Uani 1 1 d . . . 
S2 S -0.1909(3) -0.0560(3) 0.72200(7) 0.0416(6) Uani 1 1 d . . . 
S3 S 0.0932(4) -0.1060(3) 0.82480(7) 0.0435(6) Uani 1 1 d . . . 
S4 S -0.2209(3) 0.1214(3) 0.80462(7) 0.0469(6) Uani 1 1 d . . . 
S5 S 0.0607(4) 0.0570(3) 0.90447(7) 0.0503(7) Uani 1 1 d . . . 
S6 S -0.2601(4) 0.2847(4) 0.88399(8) 0.0588(8) Uani 1 1 d . . . 
C1 C 0.0804(13) -0.4617(11) 0.6185(3) 0.042(2) Uani 1 1 d . . . 
H1A H 0.1158 -0.3879 0.5996 0.050 Uiso 1 1 calc R . . 
H1B H 0.1118 -0.5672 0.6068 0.050 Uiso 1 1 calc R . . 
C2 C -0.1140(13) -0.4180(12) 0.6273(3) 0.044(2) Uani 1 1 d . . . 
H2A H -0.1487 -0.4818 0.6487 0.052 Uiso 1 1 calc R . . 
H2B H -0.1676 -0.4436 0.6049 0.052 Uiso 1 1 calc R . . 
C3 C 0.0566(12) -0.3000(10) 0.6950(2) 0.0339(19) Uani 1 1 d . . . 
C4 C -0.0883(11) -0.1975(11) 0.6868(3) 0.0342(19) Uani 1 1 d . . . 
C5 C -0.0410(12) -0.1181(11) 0.7559(3) 0.037(2) Uani 1 1 d . . . 
C6 C -0.0564(12) -0.0431(11) 0.7913(2) 0.037(2) Uani 1 1 d . . . 
C7 C -0.0101(14) 0.0372(11) 0.8595(3) 0.041(2) Uani 1 1 d . . . 
C8 C -0.1541(13) 0.1396(13) 0.8497(3) 0.046(2) Uani 1 1 d . . . 
C9 C -0.1181(14) 0.2147(14) 0.9202(3) 0.050(3) Uani 1 1 d . . . 
C10 C -0.1455(16) 0.2744(15) 0.9568(3) 0.060(3) Uani 1 1 d . . . 
C11 C -0.0195(19) 0.2134(17) 0.9865(3) 0.073(4) Uani 1 1 d . . . 
H11A H -0.0718 0.1496 1.0051 0.110 Uiso 1 1 calc R . . 
H11B H 0.0073 0.3019 0.9995 0.110 Uiso 1 1 calc R . . 
H11C H 0.0856 0.1499 0.9737 0.110 Uiso 1 1 calc R . . 
C12 C -0.3015(15) 0.416(2) 0.9672(3) 0.084(5) Uani 1 1 d . . . 
H12A H -0.3491 0.4575 0.9439 0.126 Uiso 1 1 calc R . . 
H12B H -0.2625 0.4975 0.9803 0.126 Uiso 1 1 calc R . . 
H12C H -0.3895 0.3793 0.9839 0.126 Uiso 1 1 calc R . . 
Se3 Se 0.42848(13) -0.23583(13) 0.59828(3) 0.0457(3) Uani 1 1 d . B . 
Se4 Se 0.07740(15) 0.06267(15) 0.57824(3) 0.0519(3) Uani 1 1 d . . . 
S7 S 0.3750(3) -0.0722(3) 0.68104(6) 0.0390(5) Uani 1 1 d . B . 
S8 S 0.0704(4) 0.1672(3) 0.66406(7) 0.0417(6) Uani 1 1 d . . . 
S9 S 0.3476(3) 0.0847(3) 0.76751(7) 0.0407(5) Uani 1 1 d . B . 
S10 S 0.0392(4) 0.3203(3) 0.74860(7) 0.0421(6) Uani 1 1 d . B . 
S11 S 0.3416(3) 0.2586(4) 0.84477(7) 0.0479(6) Uani 1 1 d . B . 
S12 S 0.0250(4) 0.4944(3) 0.82518(7) 0.0513(7) Uani 1 1 d . B . 
C13 C 0.4507(17) -0.0841(15) 0.5563(4) 0.067(3) Uani 1 1 d . . . 
H13A H 0.5051 -0.0028 0.5658 0.081 Uiso 1 1 calc R A 1 
H13B H 0.5295 -0.1402 0.5352 0.081 Uiso 1 1 calc R A 1 
C14A C 0.296(3) -0.007(3) 0.5410(5) 0.069(6) Uani 0.71(3) 1 d P B 1 
H14A H 0.2701 -0.0784 0.5219 0.083 Uiso 0.71(3) 1 calc PR B 1 
H14B H 0.3188 0.0862 0.5274 0.083 Uiso 0.71(3) 1 calc PR B 1 
C14B C 0.295(7) 0.068(8) 0.5541(14) 0.069(6) Uani 0.29(3) 1 d P B 2 
H14C H 0.2821 0.0892 0.5269 0.083 Uiso 0.29(3) 1 calc PR B 2 
H14D H 0.3307 0.1582 0.5647 0.083 Uiso 0.29(3) 1 calc PR B 2 
C15 C 0.3087(12) -0.0781(11) 0.6347(2) 0.035(2) Uani 1 1 d . . . 
C16 C 0.1679(13) 0.0353(11) 0.6269(3) 0.038(2) Uani 1 1 d . B . 
C17 C 0.2130(12) 0.0891(11) 0.6972(3) 0.038(2) Uani 1 1 d . B . 
C18 C 0.2017(12) 0.1552(10) 0.7344(3) 0.0348(19) Uani 1 1 d . . . 
C19 C 0.2613(12) 0.2382(11) 0.8007(3) 0.038(2) Uani 1 1 d . . . 
C20 C 0.1203(13) 0.3449(11) 0.7919(2) 0.036(2) Uani 1 1 d . B . 
C21 C 0.1711(12) 0.4232(12) 0.8602(3) 0.038(2) Uani 1 1 d . . . 
C22 C 0.1499(14) 0.4887(13) 0.8959(3) 0.047(2) Uani 1 1 d . B . 
C23 C 0.2761(17) 0.4288(17) 0.9253(3) 0.069(4) Uani 1 1 d . . . 
H23A H 0.3456 0.3267 0.9170 0.104 Uiso 1 1 calc R B . 
H23B H 0.2125 0.4188 0.9500 0.104 Uiso 1 1 calc R . . 
H23C H 0.3504 0.5026 0.9276 0.104 Uiso 1 1 calc R . . 
C24 C 0.0038(17) 0.6238(15) 0.9081(3) 0.062(3) Uani 1 1 d . . . 
H24A H -0.0704 0.6482 0.8875 0.093 Uiso 1 1 calc R B . 
H24B H 0.0493 0.7153 0.9137 0.093 Uiso 1 1 calc R . . 
H24C H -0.0622 0.5953 0.9309 0.093 Uiso 1 1 calc R . . 
I1 I 0.58731(10) 0.42518(11) 0.71639(3) 0.0652(2) Uani 1 1 d . . . 
I2 I 0.57822(13) 0.60060(13) 0.78796(3) 0.0801(3) Uani 1 1 d . . . 
I3 I 0.52130(15) 0.80733(13) 0.86880(3) 0.0898(3) Uani 1 1 d . . . 
I4 I 0.51193(15) 0.93950(15) 0.95989(4) 0.1090(4) Uani 1 1 d . . . 
I5 I 0.59898(13) 0.25031(11) 0.62681(5) 0.1129(5) Uani 1 1 d . . . 
I6 I 0.53534(11) 0.41424(11) 0.53612(3) 0.0724(3) Uani 1 1 d . . . 
Cl1 Cl -0.0530(5) 0.7347(4) 0.52512(11) 0.0817(10) Uani 1 1 d . . . 
C25 C -0.0327(18) 0.5748(17) 0.4906(4) 0.073(4) Uani 1 1 d . . . 
H25A H -0.1452 0.5741 0.4817 0.088 Uiso 1 1 calc R . . 
H25B H 0.0472 0.5889 0.4683 0.088 Uiso 1 1 calc R . . 
 
loop_ 
 _atom_site_aniso_label 
 _atom_site_aniso_U_11 
 _atom_site_aniso_U_22 
 _atom_site_aniso_U_33 
 _atom_site_aniso_U_23 
 _atom_site_aniso_U_13 
 _atom_site_aniso_U_12 
Se1 0.0482(6) 0.0315(5) 0.0326(5) -0.0043(4) -0.0055(4) 0.0029(4) 
Se2 0.0388(5) 0.0469(6) 0.0437(5) -0.0101(4) -0.0110(4) 0.0010(4) 
S1 0.0599(16) 0.0315(12) 0.0273(11) -0.0015(9) -0.0066(10) 0.0036(11) 
S2 0.0330(12) 0.0488(14) 0.0396(13) -0.0170(10) 0.0000(9) -0.0018(10) 
S3 0.0652(17) 0.0320(12) 0.0296(11) -0.0043(9) -0.0049(11) -0.0013(11) 
S4 0.0355(13) 0.0631(17) 0.0387(13) -0.0226(11) 0.0013(10) -0.0040(11) 
S5 0.0708(19) 0.0457(15) 0.0313(12) -0.0072(10) -0.0078(11) -0.0040(13) 
S6 0.0436(15) 0.078(2) 0.0469(15) -0.0332(14) -0.0026(11) 0.0046(14) 
C1 0.054(6) 0.035(5) 0.033(5) -0.007(4) -0.007(4) 0.000(4) 
C2 0.050(6) 0.038(5) 0.044(5) -0.011(4) -0.002(4) -0.014(4) 
C3 0.049(6) 0.034(5) 0.023(4) -0.003(3) -0.007(4) -0.017(4) 
C4 0.032(5) 0.033(5) 0.036(5) -0.007(4) 0.002(4) -0.006(4) 
C5 0.036(5) 0.038(5) 0.038(5) 0.001(4) -0.003(4) -0.013(4) 
C6 0.043(5) 0.046(5) 0.020(4) -0.004(4) 0.004(4) -0.010(4) 
C7 0.059(6) 0.027(5) 0.039(5) -0.003(4) -0.004(4) -0.009(4) 
C8 0.043(6) 0.048(6) 0.045(6) -0.011(4) 0.005(4) -0.011(5) 
C9 0.056(6) 0.062(7) 0.035(5) -0.019(5) 0.010(4) -0.023(5) 
C10 0.069(8) 0.068(8) 0.045(6) -0.022(5) 0.005(5) -0.022(6) 
C11 0.109(11) 0.080(9) 0.032(6) -0.015(6) -0.010(6) -0.020(8) 
C12 0.044(7) 0.148(14) 0.052(7) -0.067(8) 0.010(5) -0.006(7) 
Se3 0.0431(6) 0.0535(6) 0.0377(5) -0.0170(4) -0.0014(4) -0.0048(5) 
Se4 0.0573(7) 0.0638(7) 0.0343(5) -0.0027(5) -0.0081(5) -0.0102(5) 
S7 0.0334(12) 0.0493(14) 0.0330(11) -0.0146(10) -0.0030(9) -0.0052(10) 
S8 0.0584(16) 0.0316(12) 0.0322(12) -0.0059(9) -0.0076(10) -0.0015(11) 
S9 0.0317(12) 0.0505(14) 0.0367(12) -0.0152(10) -0.0016(9) -0.0019(10) 
S10 0.0572(16) 0.0326(12) 0.0314(12) -0.0045(9) -0.0065(10) 0.0034(11) 
S11 0.0395(14) 0.0652(17) 0.0361(13) -0.0164(11) -0.0040(10) -0.0036(12) 
S12 0.079(2) 0.0354(13) 0.0322(12) -0.0074(10) -0.0105(12) 0.0079(12) 
C13 0.069(8) 0.061(8) 0.067(8) 0.006(6) 0.026(6) -0.018(6) 
C14A 0.095(12) 0.085(16) 0.018(9) 0.002(8) 0.013(8) -0.006(12) 
C14B 0.095(12) 0.085(16) 0.018(9) 0.002(8) 0.013(8) -0.006(12) 
C15 0.040(5) 0.041(5) 0.026(4) -0.010(4) 0.002(4) -0.014(4) 
C16 0.051(6) 0.032(5) 0.034(5) -0.003(4) -0.005(4) -0.014(4) 
C17 0.039(5) 0.035(5) 0.041(5) -0.004(4) 0.003(4) -0.010(4) 
C18 0.040(5) 0.029(5) 0.036(5) -0.006(4) -0.006(4) -0.009(4) 
C19 0.034(5) 0.040(5) 0.039(5) -0.007(4) 0.000(4) -0.008(4) 
C20 0.049(6) 0.029(5) 0.029(4) 0.002(3) -0.003(4) -0.007(4) 
C21 0.037(5) 0.044(5) 0.034(5) -0.003(4) 0.005(4) -0.013(4) 
C22 0.056(7) 0.051(6) 0.034(5) -0.013(4) 0.004(4) -0.016(5) 
C23 0.067(8) 0.092(10) 0.046(6) -0.021(6) -0.008(6) -0.009(7) 
C24 0.085(9) 0.060(7) 0.037(6) -0.018(5) 0.002(5) -0.009(6) 
I1 0.0470(4) 0.0687(5) 0.0779(6) 0.0151(4) -0.0163(4) -0.0037(4) 
I2 0.0721(6) 0.0846(7) 0.0891(7) 0.0239(5) -0.0338(5) -0.0177(5) 
I3 0.0921(7) 0.0735(6) 0.0964(7) -0.0208(5) -0.0321(6) 0.0108(5) 
I4 0.0860(8) 0.0816(8) 0.1450(11) 0.0143(7) 0.0115(7) 0.0028(6) 
I5 0.0512(5) 0.0467(5) 0.2346(15) -0.0323(7) 0.0153(7) -0.0091(4) 
I6 0.0575(5) 0.0659(5) 0.0917(6) -0.0349(5) 0.0082(4) -0.0145(4) 
Cl1 0.099(3) 0.067(2) 0.077(2) -0.0127(17) -0.0255(19) -0.0037(19) 
C25 0.064(8) 0.098(11) 0.062(8) 0.008(7) -0.016(6) -0.022(8) 
 
_geom_special_details 
; 
 All esds (except the esd in the dihedral angle between two l.s. planes) 
 are estimated using the full covariance matrix.  The cell esds are taken 
 into account individually in the estimation of esds in distances, angles 
 and torsion angles; correlations between esds in cell parameters are only 
 used when they are defined by crystal symmetry.  An approximate (isotropic) 
 treatment of cell esds is used for estimating esds involving l.s. planes. 
; 
 
loop_ 
 _geom_bond_atom_site_label_1 
 _geom_bond_atom_site_label_2 
 _geom_bond_distance 
 _geom_bond_site_symmetry_2 
 _geom_bond_publ_flag 
Se1 C3 1.901(9) . ? 
Se1 C1 1.958(9) . ? 
Se2 C4 1.901(9) . ? 
Se2 C2 1.957(10) . ? 
S1 C5 1.726(10) . ? 
S1 C3 1.749(8) . ? 
S2 C4 1.743(9) . ? 
S2 C5 1.752(9) . ? 
S3 C7 1.739(9) . ? 
S3 C6 1.742(9) . ? 
S4 C8 1.717(10) . ? 
S4 C6 1.735(10) . ? 
S5 C7 1.730(10) . ? 
S5 C9 1.781(11) . ? 
S6 C8 1.747(10) . ? 
S6 C9 1.782(12) . ? 
C1 C2 1.501(14) . ? 
C1 H1A 0.9700 . ? 
C1 H1B 0.9700 . ? 
C2 H2A 0.9700 . ? 
C2 H2B 0.9700 . ? 
C3 C4 1.342(13) . ? 
C5 C6 1.372(12) . ? 
C7 C8 1.353(14) . ? 
C9 C10 1.351(13) . ? 
C10 C11 1.517(17) . ? 
C10 C12 1.551(17) . ? 
C11 H11A 0.9600 . ? 
C11 H11B 0.9600 . ? 
C11 H11C 0.9600 . ? 
C12 H12A 0.9600 . ? 
C12 H12B 0.9600 . ? 
C12 H12C 0.9600 . ? 
Se3 C15 1.890(8) . ? 
Se3 C13 1.963(12) . ? 
Se4 C14B 1.84(5) . ? 
Se4 C16 1.890(9) . ? 
Se4 C14A 2.029(19) . ? 
S7 C17 1.729(9) . ? 
S7 C15 1.742(9) . ? 
S8 C17 1.721(10) . ? 
S8 C16 1.730(9) . ? 
S9 C18 1.724(9) . ? 
S9 C19 1.737(9) . ? 
S10 C20 1.721(9) . ? 
S10 C18 1.737(9) . ? 
S11 C19 1.735(9) . ? 
S11 C21 1.778(10) . ? 
S12 C20 1.729(9) . ? 
S12 C21 1.774(10) . ? 
C13 C14A 1.41(2) . ? 
C13 C14B 1.60(6) . ? 
C13 H13A 0.9700 . ? 
C13 H13B 0.9700 . ? 
C14A H14A 0.9700 . ? 
C14A H14B 0.9700 . ? 
C14B H14C 0.9700 . ? 
C14B H14D 0.9700 . ? 
C15 C16 1.363(13) . ? 
C17 C18 1.399(12) . ? 
C19 C20 1.343(13) . ? 
C21 C22 1.342(12) . ? 
C22 C24 1.484(15) . ? 
C22 C23 1.508(15) . ? 
C23 H23A 0.9600 . ? 
C23 H23B 0.9600 . ? 
C23 H23C 0.9600 . ? 
C24 H24A 0.9600 . ? 
C24 H24B 0.9600 . ? 
C24 H24C 0.9600 . ? 
I1 I2 2.9003(16) . ? 
I4 I4 2.950(3) 2_677 ? 
I6 I6 2.935(2) 2_666 ? 
Cl1 C25 1.801(15) . ? 
C25 C25 1.45(3) 2_566 ? 
C25 H25A 0.9700 . ? 
C25 H25B 0.9700 . ? 
 
loop_ 
 _geom_angle_atom_site_label_1 
 _geom_angle_atom_site_label_2 
 _geom_angle_atom_site_label_3 
 _geom_angle 
 _geom_angle_site_symmetry_1 
 _geom_angle_site_symmetry_3 
 _geom_angle_publ_flag 
C3 Se1 C1 100.7(4) . . ? 
C4 Se2 C2 95.7(4) . . ? 
C5 S1 C3 96.4(4) . . ? 
C4 S2 C5 95.2(4) . . ? 
C7 S3 C6 94.2(5) . . ? 
C8 S4 C6 94.1(5) . . ? 
C7 S5 C9 94.2(5) . . ? 
C8 S6 C9 94.4(5) . . ? 
C2 C1 Se1 114.8(6) . . ? 
C2 C1 H1A 108.6 . . ? 
Se1 C1 H1A 108.6 . . ? 
C2 C1 H1B 108.6 . . ? 
Se1 C1 H1B 108.6 . . ? 
H1A C1 H1B 107.5 . . ? 
C1 C2 Se2 113.2(7) . . ? 
C1 C2 H2A 108.9 . . ? 
Se2 C2 H2A 108.9 . . ? 
C1 C2 H2B 108.9 . . ? 
Se2 C2 H2B 108.9 . . ? 
H2A C2 H2B 107.8 . . ? 
C4 C3 S1 116.0(7) . . ? 
C4 C3 Se1 130.4(6) . . ? 
S1 C3 Se1 113.5(5) . . ? 
C3 C4 S2 117.9(7) . . ? 
C3 C4 Se2 126.9(6) . . ? 
S2 C4 Se2 115.1(5) . . ? 
C6 C5 S1 124.0(7) . . ? 
C6 C5 S2 121.6(8) . . ? 
S1 C5 S2 114.4(5) . . ? 
C5 C6 S4 122.3(7) . . ? 
C5 C6 S3 121.3(7) . . ? 
S4 C6 S3 116.4(5) . . ? 
C8 C7 S5 119.1(7) . . ? 
C8 C7 S3 116.5(7) . . ? 
S5 C7 S3 124.4(6) . . ? 
C7 C8 S4 118.7(7) . . ? 
C7 C8 S6 117.4(8) . . ? 
S4 C8 S6 123.9(6) . . ? 
C10 C9 S5 122.7(10) . . ? 
C10 C9 S6 122.8(10) . . ? 
S5 C9 S6 114.5(5) . . ? 
C9 C10 C11 121.0(11) . . ? 
C9 C10 C12 118.7(11) . . ? 
C11 C10 C12 120.1(9) . . ? 
C10 C11 H11A 109.5 . . ? 
C10 C11 H11B 109.5 . . ? 
H11A C11 H11B 109.5 . . ? 
C10 C11 H11C 109.5 . . ? 
H11A C11 H11C 109.5 . . ? 
H11B C11 H11C 109.5 . . ? 
C10 C12 H12A 109.5 . . ? 
C10 C12 H12B 109.5 . . ? 
H12A C12 H12B 109.5 . . ? 
C10 C12 H12C 109.5 . . ? 
H12A C12 H12C 109.5 . . ? 
H12B C12 H12C 109.5 . . ? 
C15 Se3 C13 94.4(5) . . ? 
C14B Se4 C16 90.6(17) . . ? 
C14B Se4 C14A 23(2) . . ? 
C16 Se4 C14A 101.8(6) . . ? 
C17 S7 C15 95.3(4) . . ? 
C17 S8 C16 95.6(4) . . ? 
C18 S9 C19 94.0(4) . . ? 
C20 S10 C18 94.1(4) . . ? 
C19 S11 C21 93.6(4) . . ? 
C20 S12 C21 93.9(4) . . ? 
C14A C13 C14B 30(2) . . ? 
C14A C13 Se3 117.0(11) . . ? 
C14B C13 Se3 117.9(18) . . ? 
C14A C13 H13A 108.0 . . ? 
C14B C13 H13A 80.6 . . ? 
Se3 C13 H13A 108.0 . . ? 
C14A C13 H13B 108.0 . . ? 
C14B C13 H13B 128.3 . . ? 
Se3 C13 H13B 108.0 . . ? 
H13A C13 H13B 107.3 . . ? 
C13 C14A Se4 118.4(11) . . ? 
C13 C14A H14A 107.7 . . ? 
Se4 C14A H14A 107.7 . . ? 
C13 C14A H14B 107.7 . . ? 
Se4 C14A H14B 107.7 . . ? 
H14A C14A H14B 107.1 . . ? 
C13 C14B Se4 119(3) . . ? 
C13 C14B H14C 107.5 . . ? 
Se4 C14B H14C 107.5 . . ? 
C13 C14B H14D 107.5 . . ? 
Se4 C14B H14D 107.5 . . ? 
H14C C14B H14D 107.0 . . ? 
C16 C15 S7 116.4(6) . . ? 
C16 C15 Se3 123.1(6) . . ? 
S7 C15 Se3 120.6(5) . . ? 
C15 C16 S8 117.0(7) . . ? 
C15 C16 Se4 124.9(7) . . ? 
S8 C16 Se4 118.1(5) . . ? 
C18 C17 S8 122.1(7) . . ? 
C18 C17 S7 122.2(7) . . ? 
S8 C17 S7 115.7(5) . . ? 
C17 C18 S9 123.2(7) . . ? 
C17 C18 S10 120.2(7) . . ? 
S9 C18 S10 116.6(5) . . ? 
C20 C19 S11 118.4(7) . . ? 
C20 C19 S9 117.3(7) . . ? 
S11 C19 S9 124.2(6) . . ? 
C19 C20 S10 117.9(7) . . ? 
C19 C20 S12 118.6(7) . . ? 
S10 C20 S12 123.5(6) . . ? 
C22 C21 S12 121.5(8) . . ? 
C22 C21 S11 123.3(8) . . ? 
S12 C21 S11 115.1(5) . . ? 
C21 C22 C24 121.9(10) . . ? 
C21 C22 C23 121.1(10) . . ? 
C24 C22 C23 116.9(9) . . ? 
C22 C23 H23A 109.5 . . ? 
C22 C23 H23B 109.5 . . ? 
H23A C23 H23B 109.5 . . ? 
C22 C23 H23C 109.5 . . ? 
H23A C23 H23C 109.5 . . ? 
H23B C23 H23C 109.5 . . ? 
C22 C24 H24A 109.5 . . ? 
C22 C24 H24B 109.5 . . ? 
H24A C24 H24B 109.5 . . ? 
C22 C24 H24C 109.5 . . ? 
H24A C24 H24C 109.5 . . ? 
H24B C24 H24C 109.5 . . ? 
C25 C25 Cl1 108.4(12) 2_566 . ? 
C25 C25 H25A 110.0 2_566 . ? 
Cl1 C25 H25A 110.0 . . ? 
C25 C25 H25B 110.0 2_566 . ? 
Cl1 C25 H25B 110.0 . . ? 
H25A C25 H25B 108.4 . . ? 
 
_diffrn_measured_fraction_theta_max    0.984 
_diffrn_reflns_theta_full              27.43 
_diffrn_measured_fraction_theta_full   0.984 
_refine_diff_density_max    4.128 
_refine_diff_density_min   -3.976 
_refine_diff_density_rms    0.190 
 
data_7_CPDTSES-I3
 
_audit_creation_method            SHELXL-97 
_chemical_name_systematic 
; 
 ? 
; 
_chemical_name_common             ? 
_chemical_melting_point           ? 
_chemical_formula_moiety          ? 
_chemical_formula_sum 
 'C14 H12 I3 S6 Se2' 
_chemical_formula_weight          911.22 
 
loop_ 
 _atom_type_symbol 
 _atom_type_description 
 _atom_type_scat_dispersion_real 
 _atom_type_scat_dispersion_imag 
 _atom_type_scat_source 
 'C'  'C'   0.0033   0.0016 
 'International Tables Vol C Tables 4.2.6.8 and 6.1.1.4' 
 'H'  'H'   0.0000   0.0000 
 'International Tables Vol C Tables 4.2.6.8 and 6.1.1.4' 
 'I'  'I'  -0.4742   1.8119 
 'International Tables Vol C Tables 4.2.6.8 and 6.1.1.4' 
 'S'  'S'   0.1246   0.1234 
 'International Tables Vol C Tables 4.2.6.8 and 6.1.1.4' 
 'Se'  'Se'  -0.0929   2.2259 
 'International Tables Vol C Tables 4.2.6.8 and 6.1.1.4' 
 
_symmetry_cell_setting            triclinic 
_symmetry_space_group_name_H-M    'P -1'
_symmetry_space_group_name_Hall   '-P 1'
_symmetry_Int_Tables_number       2 
 
loop_ 
 _symmetry_equiv_pos_as_xyz 
 'x, y, z' 
 '-x, -y, -z' 
 
_cell_length_a                    8.443(2) 
_cell_length_b                    8.859(2) 
_cell_length_c                    16.686(5) 
_cell_angle_alpha                 84.118(11) 
_cell_angle_beta                  89.712(13) 
_cell_angle_gamma                 68.365(9) 
_cell_volume                      1153.2(5) 
_cell_formula_units_Z             2 
_cell_measurement_temperature     273 
_cell_measurement_reflns_used     2643 
_cell_measurement_theta_min       3.04 
_cell_measurement_theta_max       27.47 
 
_exptl_crystal_description        platelet 
_exptl_crystal_colour             brown 
_exptl_crystal_size_max           0.080 
_exptl_crystal_size_mid           0.060
_exptl_crystal_size_min           0.030 
_exptl_crystal_density_meas       ? 
_exptl_crystal_density_diffrn     2.624 
_exptl_crystal_density_method     'not measured' 
_exptl_crystal_F_000              838 
_exptl_absorpt_coefficient_mu     7.764 
_exptl_absorpt_correction_type    empirical 
_exptl_absorpt_correction_T_min   0.5755 
_exptl_absorpt_correction_T_max   0.8296 
_exptl_absorpt_process_details    
;
?
; 
 
_exptl_special_details 
; 
 ? 
; 
 
_diffrn_ambient_temperature       273 
_diffrn_radiation_wavelength      0.71075 
_diffrn_radiation_type            MoK\a 
_diffrn_radiation_source          'fine-focus sealed tube' 
_diffrn_radiation_monochromator   graphite 
_diffrn_measurement_device_type   'Rigaku Saturn724' 
_diffrn_measurement_method        \w 
_diffrn_detector_area_resol_mean  7.111 
_diffrn_standards_number          ? 
_diffrn_standards_interval_count  ? 
_diffrn_standards_interval_time   ? 
_diffrn_standards_decay_%         ? 
_diffrn_reflns_number             9519 
_diffrn_reflns_av_R_equivalents   0.0705 
_diffrn_reflns_av_sigmaI/netI     0.0977 
_diffrn_reflns_limit_h_min        -10 
_diffrn_reflns_limit_h_max        10 
_diffrn_reflns_limit_k_min        -11 
_diffrn_reflns_limit_k_max        11 
_diffrn_reflns_limit_l_min        -21 
_diffrn_reflns_limit_l_max        21 
_diffrn_reflns_theta_min          3.04 
_diffrn_reflns_theta_max          27.45 
_reflns_number_total              5193 
_reflns_number_gt                 2485 
_reflns_threshold_expression      >2sigma(I) 
 
_computing_data_collection        'CrystalClear (Rigaku Inc., 2008)' 
_computing_cell_refinement        CrystalClear 
_computing_data_reduction         CrystalClear 
_computing_structure_solution     'Il Milione (Burla, et al., 2007)' 
_computing_structure_refinement   'SHELXL97 (Sheldrick, 2008)'
_computing_molecular_graphics     'CrystalStructure 4.0' 
_computing_publication_material   'CrystalStructure 4.0 (Rigaku, 2010)' 
 
_refine_special_details 
; 
 Refinement of F^2^ against ALL reflections.  The weighted R-factor wR and 
 goodness of fit S are based on F^2^, conventional R-factors R are based 
 on F, with F set to zero for negative F^2^. The threshold expression of 
 F^2^ > 2sigma(F^2^) is used only for calculating R-factors(gt) etc. and is 
 not relevant to the choice of reflections for refinement.  R-factors based 
 on F^2^ are statistically about twice as large as those based on F, and R- 
 factors based on ALL data will be even larger. 
; 
 
_refine_ls_structure_factor_coef  Fsqd  
_refine_ls_matrix_type            full 
_refine_ls_weighting_scheme       calc  
_refine_ls_weighting_details 
 'calc w=1/[\s^2^(Fo^2^)+(0.0443P)^2^+0.0000P] where P=(Fo^2^+2Fc^2^)/3' 
_atom_sites_solution_primary      direct 
_atom_sites_solution_secondary    difmap 
_atom_sites_solution_hydrogens    geom 
_refine_ls_hydrogen_treatment     constr 
_refine_ls_extinction_method      none 
_refine_ls_extinction_coef        ? 
_refine_ls_number_reflns          5193 
_refine_ls_number_parameters      229 
_refine_ls_number_restraints      0 
_refine_ls_R_factor_all           0.0972 
_refine_ls_R_factor_gt            0.0455 
_refine_ls_wR_factor_ref          0.1235 
_refine_ls_wR_factor_gt           0.0993 
_refine_ls_goodness_of_fit_ref    0.902 
_refine_ls_restrained_S_all       0.902 
_refine_ls_shift/su_max           0.000 
_refine_ls_shift/su_mean          0.000 
 
loop_ 
 _atom_site_label 
 _atom_site_type_symbol 
 _atom_site_fract_x 
 _atom_site_fract_y 
 _atom_site_fract_z 
 _atom_site_U_iso_or_equiv 
 _atom_site_adp_type 
 _atom_site_occupancy 
 _atom_site_symmetry_multiplicity 
 _atom_site_calc_flag 
 _atom_site_refinement_flags 
 _atom_site_disorder_assembly 
 _atom_site_disorder_group 
Se1 Se 0.37039(12) 0.89831(12) 0.20161(5) 0.0567(3) Uani 1 1 d . . . 
Se2 Se 0.69487(14) 0.51354(12) 0.16952(6) 0.0650(3) Uani 1 1 d . . . 
S1 S 0.2965(3) 0.7010(3) 0.35014(12) 0.0467(6) Uani 1 1 d . . . 
S2 S 0.5653(3) 0.3893(3) 0.32905(13) 0.0545(6) Uani 1 1 d . . . 
S3 S 0.1976(3) 0.5435(3) 0.51658(12) 0.0463(6) Uani 1 1 d . . . 
S4 S 0.4721(3) 0.2287(2) 0.49636(12) 0.0464(5) Uani 1 1 d . . . 
S5 S 0.0827(3) 0.3872(3) 0.66672(12) 0.0461(6) Uani 1 1 d . . . 
S6 S 0.3553(3) 0.0648(3) 0.64223(12) 0.0499(6) Uani 1 1 d . . . 
C1 C 0.4497(16) 0.8273(16) 0.0974(6) 0.089(4) Uani 1 1 d . . . 
H1A H 0.3572 0.8814 0.0579 0.107 Uiso 1 1 calc R . . 
H1B H 0.5415 0.8648 0.0828 0.107 Uiso 1 1 calc R . . 
C2 C 0.5122(15) 0.6470(15) 0.0910(5) 0.080(3) Uani 1 1 d . . . 
H2A H 0.5531 0.6275 0.0372 0.096 Uiso 1 1 calc R . . 
H2B H 0.4168 0.6114 0.0979 0.096 Uiso 1 1 calc R . . 
C3 C 0.4254(10) 0.6955(11) 0.2676(4) 0.044(2) Uani 1 1 d . . . 
C4 C 0.5482(12) 0.5511(10) 0.2577(5) 0.049(2) Uani 1 1 d . . . 
C5 C 0.4029(10) 0.4979(10) 0.3873(4) 0.0418(19) Uani 1 1 d . . . 
C6 C 0.3609(10) 0.4314(10) 0.4595(4) 0.0401(19) Uani 1 1 d . . . 
C7 C 0.2158(10) 0.3780(10) 0.5859(4) 0.042(2) Uani 1 1 d . . . 
C8 C 0.3392(10) 0.2338(10) 0.5753(4) 0.042(2) Uani 1 1 d . . . 
C9 C 0.1940(9) 0.1787(9) 0.7040(4) 0.0381(18) Uani 1 1 d . . . 
C10 C 0.1568(9) 0.1140(9) 0.7726(4) 0.0353(18) Uani 1 1 d . . . 
C11 C 0.0271(10) 0.2095(10) 0.8315(4) 0.045(2) Uani 1 1 d . . . 
H11A H 0.0447 0.3082 0.8415 0.053 Uiso 1 1 calc R . . 
H11B H -0.0888 0.2383 0.8111 0.053 Uiso 1 1 calc R . . 
C12 C 0.0641(12) 0.0895(11) 0.9075(5) 0.069(3) Uani 1 1 d . . . 
H12A H 0.1271 0.1202 0.9471 0.082 Uiso 1 1 calc R . . 
H12B H -0.0420 0.0907 0.9307 0.082 Uiso 1 1 calc R . . 
C13 C 0.1629(18) -0.0716(12) 0.8863(6) 0.110(5) Uani 1 1 d . . . 
H13A H 0.0893 -0.1332 0.8839 0.132 Uiso 1 1 calc R . . 
H13B H 0.2506 -0.1280 0.9278 0.132 Uiso 1 1 calc R . . 
C14 C 0.2445(12) -0.0660(10) 0.8073(5) 0.054(2) Uani 1 1 d . . . 
H14A H 0.2231 -0.1385 0.7726 0.065 Uiso 1 1 calc R . . 
H14B H 0.3666 -0.0956 0.8144 0.065 Uiso 1 1 calc R . . 
I1 I 0.0000 0.5000 0.0000 0.0504(2) Uani 1 2 d S . . 
I2 I 0.25496(9) 0.32333(8) 0.12768(4) 0.0781(3) Uani 1 1 d . . . 
I3 I 0.0000 0.0000 0.5000 0.0564(3) Uani 1 2 d S . . 
I4 I 0.10971(9) 0.16757(8) 0.36403(4) 0.0736(2) Uani 1 1 d . . . 
 
loop_ 
 _atom_site_aniso_label 
 _atom_site_aniso_U_11 
 _atom_site_aniso_U_22 
 _atom_site_aniso_U_33 
 _atom_site_aniso_U_23 
 _atom_site_aniso_U_13 
 _atom_site_aniso_U_12 
Se1 0.0683(6) 0.0605(6) 0.0448(5) 0.0130(5) 0.0042(4) -0.0329(5) 
Se2 0.0988(8) 0.0556(6) 0.0516(5) -0.0158(5) 0.0450(5) -0.0394(6) 
S1 0.0457(13) 0.0522(13) 0.0379(11) 0.0049(10) 0.0140(9) -0.0158(11) 
S2 0.0837(17) 0.0385(12) 0.0460(12) -0.0103(10) 0.0358(12) -0.0271(12) 
S3 0.0457(12) 0.0465(12) 0.0363(11) 0.0088(10) 0.0136(9) -0.0085(10) 
S4 0.0631(14) 0.0374(11) 0.0379(11) -0.0065(9) 0.0232(10) -0.0173(11) 
S5 0.0430(12) 0.0470(12) 0.0359(11) 0.0102(10) 0.0148(9) -0.0062(10) 
S6 0.0752(16) 0.0361(11) 0.0367(11) -0.0059(9) 0.0242(11) -0.0183(11) 
C1 0.113(10) 0.110(10) 0.045(6) 0.003(6) 0.017(6) -0.045(8) 
C2 0.130(10) 0.112(10) 0.030(5) -0.024(6) 0.016(5) -0.077(8) 
C3 0.053(5) 0.055(5) 0.031(4) 0.002(4) 0.007(4) -0.031(5) 
C4 0.080(6) 0.048(5) 0.040(4) -0.015(4) 0.030(4) -0.047(5) 
C5 0.056(5) 0.041(5) 0.035(4) -0.008(4) 0.010(4) -0.024(4) 
C6 0.042(5) 0.044(5) 0.034(4) -0.002(4) 0.017(3) -0.016(4) 
C7 0.049(5) 0.044(5) 0.030(4) 0.006(4) 0.011(4) -0.017(4) 
C8 0.055(5) 0.039(5) 0.032(4) 0.004(4) 0.014(4) -0.019(4) 
C9 0.040(4) 0.034(4) 0.037(4) -0.002(4) 0.007(3) -0.011(4) 
C10 0.034(4) 0.035(4) 0.034(4) 0.001(3) 0.006(3) -0.010(3) 
C11 0.052(5) 0.052(5) 0.032(4) 0.008(4) 0.016(4) -0.024(4) 
C12 0.083(7) 0.061(7) 0.040(5) 0.011(5) 0.020(5) -0.006(6) 
C13 0.184(13) 0.045(6) 0.065(7) 0.010(6) 0.061(8) -0.006(8) 
C14 0.094(7) 0.044(5) 0.038(5) -0.009(4) 0.022(5) -0.040(5) 
I1 0.0605(5) 0.0392(4) 0.0441(4) -0.0024(4) 0.0178(4) -0.0105(4) 
I2 0.0803(5) 0.0589(4) 0.0781(5) 0.0181(4) -0.0056(4) -0.0124(4) 
I3 0.0453(5) 0.0472(5) 0.0678(6) -0.0080(4) 0.0164(4) -0.0067(4) 
I4 0.0796(5) 0.0569(4) 0.0780(5) -0.0068(4) 0.0372(4) -0.0185(4) 
 
_geom_special_details 
; 
 All esds (except the esd in the dihedral angle between two l.s. planes) 
 are estimated using the full covariance matrix.  The cell esds are taken 
 into account individually in the estimation of esds in distances, angles 
 and torsion angles; correlations between esds in cell parameters are only 
 used when they are defined by crystal symmetry.  An approximate (isotropic) 
 treatment of cell esds is used for estimating esds involving l.s. planes. 
; 
 
loop_ 
 _geom_bond_atom_site_label_1 
 _geom_bond_atom_site_label_2 
 _geom_bond_distance 
 _geom_bond_site_symmetry_2 
 _geom_bond_publ_flag 
Se1 C3 1.908(8) . ? 
Se1 C1 1.941(10) . ? 
Se2 C4 1.894(8) . ? 
Se2 C2 1.962(11) . ? 
S1 C5 1.736(8) . ? 
S1 C3 1.745(8) . ? 
S2 C5 1.719(8) . ? 
S2 C4 1.730(8) . ? 
S3 C6 1.722(8) . ? 
S3 C7 1.732(7) . ? 
S4 C8 1.720(7) . ? 
S4 C6 1.738(8) . ? 
S5 C7 1.740(7) . ? 
S5 C9 1.781(7) . ? 
S6 C8 1.736(7) . ? 
S6 C9 1.766(8) . ? 
C1 C2 1.501(14) . ? 
C1 H1A 0.9700 . ? 
C1 H1B 0.9700 . ? 
C2 H2A 0.9700 . ? 
C2 H2B 0.9700 . ? 
C3 C4 1.342(11) . ? 
C5 C6 1.388(10) . ? 
C7 C8 1.346(10) . ? 
C9 C10 1.316(10) . ? 
C10 C11 1.536(10) . ? 
C10 C14 1.540(10) . ? 
C11 C12 1.523(10) . ? 
C11 H11A 0.9700 . ? 
C11 H11B 0.9700 . ? 
C12 C13 1.443(12) . ? 
C12 H12A 0.9700 . ? 
C12 H12B 0.9700 . ? 
C13 C14 1.489(12) . ? 
C13 H13A 0.9700 . ? 
C13 H13B 0.9700 . ? 
C14 H14A 0.9700 . ? 
C14 H14B 0.9700 . ? 
I1 I2 2.9155(9) . ? 
I1 I2 2.9155(9) 2_565 ? 
I3 I4 2.9174(9) 2_556 ? 
I3 I4 2.9175(9) . ? 
 
loop_ 
 _geom_angle_atom_site_label_1 
 _geom_angle_atom_site_label_2 
 _geom_angle_atom_site_label_3 
 _geom_angle 
 _geom_angle_site_symmetry_1 
 _geom_angle_site_symmetry_3 
 _geom_angle_publ_flag 
C3 Se1 C1 102.1(4) . . ? 
C4 Se2 C2 93.4(4) . . ? 
C5 S1 C3 95.3(4) . . ? 
C5 S2 C4 96.2(4) . . ? 
C6 S3 C7 93.9(4) . . ? 
C8 S4 C6 93.8(4) . . ? 
C7 S5 C9 93.3(4) . . ? 
C8 S6 C9 93.9(4) . . ? 
C2 C1 Se1 116.8(7) . . ? 
C2 C1 H1A 108.1 . . ? 
Se1 C1 H1A 108.1 . . ? 
C2 C1 H1B 108.1 . . ? 
Se1 C1 H1B 108.1 . . ? 
H1A C1 H1B 107.3 . . ? 
C1 C2 Se2 114.6(7) . . ? 
C1 C2 H2A 108.6 . . ? 
Se2 C2 H2A 108.6 . . ? 
C1 C2 H2B 108.6 . . ? 
Se2 C2 H2B 108.6 . . ? 
H2A C2 H2B 107.6 . . ? 
C4 C3 S1 116.9(6) . . ? 
C4 C3 Se1 128.2(6) . . ? 
S1 C3 Se1 114.9(5) . . ? 
C3 C4 S2 116.7(6) . . ? 
C3 C4 Se2 124.3(6) . . ? 
S2 C4 Se2 119.0(5) . . ? 
C6 C5 S2 123.4(6) . . ? 
C6 C5 S1 121.9(6) . . ? 
S2 C5 S1 114.8(4) . . ? 
C5 C6 S3 122.3(6) . . ? 
C5 C6 S4 121.0(6) . . ? 
S3 C6 S4 116.7(4) . . ? 
C8 C7 S3 117.4(6) . . ? 
C8 C7 S5 118.7(6) . . ? 
S3 C7 S5 123.9(5) . . ? 
C7 C8 S4 117.8(6) . . ? 
C7 C8 S6 118.2(6) . . ? 
S4 C8 S6 124.0(5) . . ? 
C10 C9 S6 122.5(6) . . ? 
C10 C9 S5 122.0(6) . . ? 
S6 C9 S5 115.5(4) . . ? 
C9 C10 C11 124.7(7) . . ? 
C9 C10 C14 124.7(7) . . ? 
C11 C10 C14 110.4(6) . . ? 
C12 C11 C10 103.1(6) . . ? 
C12 C11 H11A 111.1 . . ? 
C10 C11 H11A 111.1 . . ? 
C12 C11 H11B 111.1 . . ? 
C10 C11 H11B 111.1 . . ? 
H11A C11 H11B 109.1 . . ? 
C13 C12 C11 108.4(7) . . ? 
C13 C12 H12A 110.0 . . ? 
C11 C12 H12A 110.0 . . ? 
C13 C12 H12B 110.0 . . ? 
C11 C12 H12B 110.0 . . ? 
H12A C12 H12B 108.4 . . ? 
C12 C13 C14 112.2(8) . . ? 
C12 C13 H13A 109.2 . . ? 
C14 C13 H13A 109.2 . . ? 
C12 C13 H13B 109.2 . . ? 
C14 C13 H13B 109.2 . . ? 
H13A C13 H13B 107.9 . . ? 
C13 C14 C10 102.8(7) . . ? 
C13 C14 H14A 111.2 . . ? 
C10 C14 H14A 111.2 . . ? 
C13 C14 H14B 111.2 . . ? 
C10 C14 H14B 111.2 . . ? 
H14A C14 H14B 109.1 . . ? 
I2 I1 I2 180.0 . 2_565 ? 
I4 I3 I4 180.0 2_556 . ? 
 
_diffrn_measured_fraction_theta_max    0.984 
_diffrn_reflns_theta_full              27.45 
_diffrn_measured_fraction_theta_full   0.984 
_refine_diff_density_max    0.890 
_refine_diff_density_min   -1.358 
_refine_diff_density_rms    0.174 
